# Supplementary material
Source: PubMed Central journal article supplement (PMC3287227)
Supplement: JCI60224sd.pdf [file JCI60224sd.pdf]

**Supplemental Table 1. Primer sequences**

|                             | Forward Primer                     | Reverse primer                                                      |
|-----------------------------|------------------------------------|---------------------------------------------------------------------|
| gMCM4                       | AAAAGACAAATCCAGGAAGG<br>C          | AACCTGAGCAGATAAAGCATCAG                                             |
| cMCM4                       | GAGCTACTCGCCAGGTGG                 | GGAGTGCCGTATGTCAGTGG                                                |
| 1st ATG<br>MCM4             | ATAGAATTCAATGTCGTCCCC<br>GGCGTCGAC | GAGGGATCCTTGCTCACAAGGC                                              |
| 2 <sup>nd</sup> ATG<br>MCM4 | ATAGAATTCAATGCCAACCTC<br>G         | GAGGGATCCTTGCTCACAAGGC                                              |
| 3 <sup>rd</sup> ATG<br>MCM4 | ATAGAATTCAATGCATTCTTCA             | GAGGGATCCTTGCTCACAAGGC                                              |
| gANK1                       | CAGCCTCCCCTCTTCCC                  | GGAGGCGGCTCGTACTG                                                   |
| gADAM5P                     | CGAAATGCATTGTAAAC                  | CTTAAGAAGACAAAATTG                                                  |
| Cloning<br>MCM4-HA          | GAGGGATCCTTGCTCACAAGG<br>C         | GATGGATCCTCAAGCGTAATCTG<br>GCACATCGTATGGGTAGAGCAAG<br>CGCACGGTCTTCC |
| SDM<br>MCM4                 | CGACGGAATTCAAAGTCGTCC<br>CCGG      | CCGGGGACGACTTTGAATTCCGT<br>CG                                       |
